# Supplementary material
Source: MDPI journal article supplement (https://www.mdpi.com/2077-0472/12/11/1882)
Supplement: s1 [file s1]

# Precision Agriculture in Brazil: The Trajectory of 25 Years of Scientific Research

**Maurício Roberto Cherubin <sup>1,\*</sup>, Júnior Melo Damian <sup>1</sup>, Tiago Rodrigues Tavares <sup>2,\*</sup>, Rodrigo Gonçalves Trevisan <sup>3</sup>, André Freitas Colaço <sup>4</sup>, Mateus Tonini Eitelwein <sup>3</sup>, Maurício Martello <sup>5</sup>, Ricardo Yassushi Inamasu <sup>6</sup>, Osmar Henrique de Castro Pias <sup>7</sup> and José Paulo Molin <sup>5</sup>**

<sup>1</sup> Department of Soil Science, “Luiz de Queiroz” College of Agriculture (ESALQ), University of São Paulo (USP), Piracicaba 13418-900, São Paulo, Brazil

<sup>2</sup> Center of Nuclear Energy in Agriculture (CENA), University of São Paulo (USP), Piracicaba 13416-000, São Paulo, Brazil

<sup>3</sup> Smart Sensing Brasil, Piracicaba 13416-404, São Paulo, Brazil

<sup>4</sup> CSIRO, Waite Campus, Locked Bag 2, Glen Osmond, South Australia 5064, Australia

<sup>5</sup> Department of Biosystems Engineering, “Luiz de Queiroz” College of Agriculture (ESALQ), University of São Paulo (USP), Piracicaba 13418-900, São Paulo, Brazil

<sup>6</sup> Embrapa Instrumentação, Brazilian Agricultural Research Corporation, São Carlos 13560-970, São Paulo, Brazil

<sup>7</sup> Federal Institute of Education, Science and Technology Farroupilha, Júlio de Castilhos 98130-000, Rio Grande do Sul, Brazil

\* Correspondence: cherubin@usp.br (M.R.C.); tiagosrt@usp.br (T.R.T.)

## Supplementary materials

**Table S1. List of articles gathered in the bibliometric review**

| Year | Authors            | Article                                                                                                                               | Journal                                               | Language   |
|------|--------------------|---------------------------------------------------------------------------------------------------------------------------------------|-------------------------------------------------------|------------|
| 1996 | Albuquerque et al. | Variabilidade de solo e planta em Podzólico Vermelho-Amarelo                                                                          | Revista Brasileira de Ciência do Solo                 | Portuguese |
| 1997 | Berg & Klamp       | Variabilidade espacial de características de solos na região do Planalto Médio, RS: I. análise da variância por amostragem aninhada.  | Revista Brasileira de Ciência do Solo                 | Portuguese |
| 1997 | Molin              | Agricultura de precisão parte 1: o que é e estado da arte em sensoriamento                                                            | Revista Engenharia Agrícola                           | Portuguese |
| 1997 | Molin              | Agricultura de precisão parte 2: diagnóstico, aplicação localizada e considerações econômicas                                         | Revista Engenharia Agrícola                           | Portuguese |
| 1997 | Balastreire et al. | Agricultura de precisão: mapeamento da produtividade de milho                                                                         | Engenharia Rural                                      | Portuguese |
| 1998 | Molin              | Utilização de GPS em agricultura de precisão                                                                                          | Revista Engenharia Agrícola                           | Portuguese |
| 1999 | Couto & Klamt      | Variabilidade espacial de micronutrientes em solo sob pivô central no sul do Estado de Mato Grosso                                    | Pesquisa agropecuaria brasileira                      | Portuguese |
| 2000 | Saraiva et al.     | A Weighing System for Grab Loaders for Sugar Cane Yield Mapping                                                                       | Precision Agriculture                                 | English    |
| 2001 | Sparovek & Schnug  | Soil tillage and precision agriculture - A theoretical case study for soil erosion control in Brazilian sugar cane production         | Soil & Tillage research                               | English    |
| 2001 | Rodrigues et al.   | GEOPIVO: modelo para simulação do desempenho de sistemas de irrigação tipo pivô central                                               | Revista Brasileira de Engenharia Agrícola e Ambiental | Portuguese |
| 2001 | Balastreire & Baio | Avaliação de uma metodologia prática para o mapeamento de plantas daninhas                                                            | Revista Brasileira de Engenharia Agrícola e Ambiental | Portuguese |
| 2001 | Baio et al.        | Avaliação da acurácia de uma barra de luz utilizada na agricultura de precisão, em relação ao marcador de espuma                      | Revista Brasileira de Engenharia Agrícola e Ambiental | Portuguese |
| 2001 | Sena Junior et al. | Algoritmo para classificação de plantas de milho atacadas pela lagarta do cartucho (Spodoptera frugiperda, Smith) em imagens digitais | Revista Brasileira de Engenharia Agrícola e Ambiental | Portuguese |
| 2001 | Santos et al.      | Opportunities and limitations for the application of simulation and modeling as a support for precision farming                       | Acta Scientiarum - Tehcnology                         | English    |
| 2001 | Santos et al.      | Monitoramento localizado da produtividade de milho cultivado sob irrigação                                                            | Revista Brasileira de Engenharia Agrícola e Ambiental | Portuguese |

|      |                              |                                                                                                                                            |                                                                   |            |
|------|------------------------------|--------------------------------------------------------------------------------------------------------------------------------------------|-------------------------------------------------------------------|------------|
| 2001 | Molin & Milan                | Effect of globalization on the agricultural machinery industry in Brazil                                                                   | AMA, Agricultural Mechanization in Asia, Africa and Latin America | English    |
| 2002 | Farias et al.                | Using Geostatistical Analysis to Evaluate the Presence of <i>Rotylenchulus reniformis</i> in Cotton Crops in Brazil: Economic Implications | The Journal of Nematology                                         | English    |
| 2002 | Shiratsuchi & Christoffoleti | Aplicação localizada de herbicidas em pós-emergência na cultura de soja                                                                    | Planta Daninha                                                    | Portuguese |
| 2002 | Carvalho et al.              | Análise de correspondência - uma ferramenta útil na interpretação de mapas de produtividade                                                | Revista Brasileira de Ciência do Solo                             | Portuguese |
| 2002 | Tschiedel & Ferreira         | Introdução à agricultura de precisão: conceitos e vantagens                                                                                | Ciência Rural                                                     | Portuguese |
| 2002 | Antuniassi et al.            | Performance evaluation of injection metering systems                                                                                       | Revista Brasileira de Engenharia Agrícola e Ambiental             | English    |
| 2002 | Bianchini et al.             | Penetrógrafo eletrônico automático                                                                                                         | Revista Brasileira de Engenharia Agrícola e Ambiental             | Portuguese |
| 2002 | Molin                        | Definição de unidades de manejo a partir de mapas de Produtividade                                                                         | Revista Engenharia Agrícola                                       | Portuguese |
| 2003 | Dematte et al.               | Soil chemical alterations promoted by fertilizer application assessed by spectral reflectance                                              | Soil Science                                                      | English    |
| 2003 | Sena et al.                  | Fall armyworm damaged maize plant identification using digital images                                                                      | Biosystems engineering                                            | English    |
| 2003 | Silva et al.                 | Variabilidade espacial das características químicas do solo e produtividade de milho em um Argissolo Vermelho-Amarelo distrófico arênico   | Revista Brasileira de Ciência do Solo                             | Portuguese |
| 2003 | Santos et al.                | Prospecção de zonas potenciais para manejo diferenciado em agricultura de precisão utilizando-se padrões de solo-planta-clima              | Revista Brasileira de Engenharia Agrícola e Ambiental             | Portuguese |
| 2003 | Farias et al.                | Agricultura de precisão: mapeamento da produtividade em pomares cítricos usando geoestatística                                             | Revista Brasileira de Fruticultura                                | Portuguese |
| 2003 | Menegatti & Molin            | Metodologia para identificação e caracterização de erros em mapas de produtividade                                                         | Revista Brasileira de Engenharia Agrícola e Ambiental             | Portuguese |
| 2003 | Sena Junior et al.           | Avaliação de métodos automáticos de limiarização para imagens de plantas de milho atacadas por <i>Spodoptera frugiperda</i>                | Revista Brasileira de Engenharia Agrícola e Ambiental             | Portuguese |
| 2004 | Cora et al.                  | Variabilidade espacial de atributos do solo para adoção do sistema de agricultura de precisão na cultura de cana-de-açúcar                 | Revista brasileira de Ciência do solo                             | Portuguese |
| 2004 | Araujo et al.                | Uso de fotografias aéreas coloridas 35 mm na avaliação de produtividade de grãos                                                           | Engenharia Agrícola                                               | Portuguese |

|      |                       |                                                                                                                                    |                                                       |            |
|------|-----------------------|------------------------------------------------------------------------------------------------------------------------------------|-------------------------------------------------------|------------|
| 2004 | Shiratsuchi et al.    | Mapeamento da distribuição espacial da infestação de <i>Panicum maximum</i> durante a colheita da cultura de milho                 | Planta Daninha                                        | Portuguese |
| 2004 | Menegatti & Molin.    | Remoção de erros em mapas de produtividade via filtragem de dados brutos                                                           | Revista Brasileira de Engenharia Agrícola e Ambiental | Portuguese |
| 2004 | Johanann et al.       | Variabilidade espacial dos atributos físicos do solo e da produtividade em um Latossolo Bruno distrófico da região de Cascavel, PR | Revista Brasileira de Engenharia Agrícola e Ambiental | Portuguese |
| 2004 | de Oliveira et al.    | Sorção do herbicida imazaquin em Latossolo sob plantio direto e convencional                                                       | Pesquisa agropecuaria brasileira                      | Portuguese |
| 2004 | Cerri et al.          | Assessment of soil property spatial variation in an Amazon pasture: Basis for selecting an agronomic experimental area             | Geordema                                              | English    |
| 2004 | Antuniassi et al.     | Soil and Weed Survey for Spatially Variable Herbicide Application on Railways                                                      | Precision Agriculture                                 | English    |
| 2005 | Shiratsuchi et al.    | Correlação da distribuição espacial do banco de sementes de plantas daninhas com a fertilidade dos solos                           | Planta Daninha                                        | Portuguese |
| 2005 | Molin et al.          | Mensuração da condutividade elétrica do solo por indução e sua correlação com fatores de produção                                  | Engenharia Agrícola                                   | Portuguese |
| 2005 | Sanchez et al.        | Variabilidade espacial de propriedades de Latossolo e da produção de café em diferentes superfícies geomórficas                    | Revista Brasileira de Engenharia Agrícola e Ambiental | Portuguese |
| 2006 | Motomiya et al.       | Uso da krigagem indicatriz na avaliação de indicadores de fertilidade do solo                                                      | Revista brasileira de Ciência do solo                 | Portuguese |
| 2006 | Molin et al .         | Avaliação de intervenções em unidades de aplicação localizada de fertilizantes e de populações de milho                            | Engenharia Agrícola                                   | Portuguese |
| 2006 | Angelico              | Desempenho da co-krigagem na determinação da variabilidade de atributos do solo                                                    | Revista Brasileira de Ciência do Solo                 | Portuguese |
| 2006 | Weirich Neto et al.   | Necessidade de fertilizante e calcário em área sob sistema plantio direto considerando variabilidade espacial                      | Revista Brasileira de Engenharia Agrícola e Ambiental | Portuguese |
| 2006 | de Souza et al.       | Otimização amostral de atributos de latossolos considerando aspectos solo-relevo                                                   | Ciência Rural                                         | Portuguese |
| 2006 | Stabile & Balastreire | Comparação de três receptores GPS para uso em agricultura de precisão                                                              | Engenharia Agrícola                                   | Portuguese |
| 2006 | Vieria Junior et al.  | População de plantas e alguns atributos do solo relacionados ao rendimento de grãos de milho                                       | Acta Scientiarum - Agronomy                           | Portuguese |
| 2006 | Molin et al .         | Análise espacial da ocorrência do índice de cone em área sob semeadura direta e sua relação com fatores do solo                    | Engenharia Agrícola                                   | Portuguese |

|      |                  |                                                                                                                                   |                                                       |            |
|------|------------------|-----------------------------------------------------------------------------------------------------------------------------------|-------------------------------------------------------|------------|
| 2006 | Machado et al.   | Mapeamento da condutividade elétrica e relação com a argila de latossolo sob plantio direto                                       | Pesquisa Agropecuária Brasileira                      | Portuguese |
| 2006 | Johanann et al.  | Desenvolvimento e avaliação de uma servoválvula de baixo custo para a aplicação de insumos líquidos                               | Engenharia Agrícola                                   | Portuguese |
| 2006 | Umezu & Cappelli | Desenvolvimento e avaliação de um controlador eletrônico para equipamentos de aplicação de insumos                                | Revista Brasileira de Engenharia Agrícola e Ambiental | Portuguese |
| 2006 | Souza et al.     | Using a field radiometer to estimate instantaneous sky clearness                                                                  | Revista Brasileira de Engenharia Agrícola e Ambiental | English    |
| 2006 | Adamchuk & Molin | Hastes instrumentadas para a mensuração da resistência mecânica do solo                                                           | Engenharia Agrícola                                   | Portuguese |
| 2006 | Corá & Beraldo   | Variabilidade espacial de atributos do solo antes e após calagem e fosfatagem em doses variadas na cultura de cana-de-açúcar      | Engenharia Agrícola                                   | Portuguese |
| 2006 | Almeida et al.   | ASTER and Landsat ETM+ images applied to sugarcane yield forecast                                                                 | International Journal of Remote Sensing               | English    |
| 2006 | Molin et al.     | Utilização de dados georreferenciados na determinação de parâmetros de desempenho em colheita mecanizada                          | Engenharia Agrícola                                   | Portuguese |
| 2006 | Genú & Dematte   | Determination of soil attribute contents by means of reflected electromagnetic energy                                             | International Journal of Remote Sensing               | English    |
| 2007 | Silva et al.     | The economic feasibility of precision agriculture in Mato Grosso do Sul State, Brazil: a case study                               | Precision Agriculture                                 | English    |
| 2007 | Amaro et al.     | Amostragem e variabilidade espacial de atributos físicos de um latossolo vermelho em Mossoró, RN                                  | Revista Brasileira de Ciência do Solo                 | Portuguese |
| 2007 | Machado et al.   | Variabilidade espacial de atributos químicos do solo em áreas sob sistema plantio convencional                                    | Revista Brasileira de Ciência do Solo                 | Portuguese |
| 2007 | Werner et al.    | Aplicação de fertilizantes a taxa variável em agricultura de precisão variando a velocidade de deslocamento                       | Revista Brasileira de Engenharia Agrícola e Ambiental | Portuguese |
| 2007 | Molin & Mascarin | Colheita de citros e obtenção de dados para mapeamento da produtividade                                                           | Engenharia Agrícola                                   | Portuguese |
| 2007 | de Souza et al.  | Influência da variabilidade espacial de atributos químicos de um latossolo na aplicação de insumos para cultura de cana-de-açúcar | Ciência e Agrotecnologia                              | Portuguese |
| 2007 | Colet et al.     | Processo de semeadura e o rendimento do milho na região dos Campos Gerais do Paraná                                               | Ciência Rural                                         | Portuguese |
| 2007 | Baesso et al.    | Determinação do "status" nutricional de nitrogênio no feijoeiro utilizando imagens digitais coloridas                             | Engenharia Agrícola                                   | Portuguese |

|      |                   |                                                                                                                                       |                                                       |            |
|------|-------------------|---------------------------------------------------------------------------------------------------------------------------------------|-------------------------------------------------------|------------|
| 2007 | Assumpção         | Uso da krigagem indicatriz na avaliação da probabilidade da produtividade de soja segundo os padrões regional, estadual e nacional    | Acta Scientiarum - Agronomy                           | Portuguese |
| 2007 | Michelan et al.   | Determinação e remoção do tempo de atraso em mapas de colheita                                                                        | Acta Scientiarum - Agronomy                           | Portuguese |
| 2007 | da Silva et al.   | Variabilidade espacial de atributos químicos e de produtividade na cultura do café                                                    | Ciência Rural                                         | Portuguese |
| 2007 | Silva et al.      | Variabilidade espacial e controle estatístico do processo de perdas na colheita mecanizada do algodoeiro                              | Engenharia Agrícola                                   | Portuguese |
| 2007 | Amado et al.      | Variabilidade espacial e temporal da produtividade de culturas sob sistema plantio direto                                             | Pesquisa Agropecuária Brasileira                      | Portuguese |
| 2007 | Camili et al.     | From wireless sensors to field mapping: Anatomy of an application for precision agriculture                                           | Computers and Electronics in Agriculture              | English    |
| 2007 | Murakami et al.   | An infrastructure for the development of distributed service-oriented information systems for precision agriculture                   | Computers and Electronics in Agriculture              | English    |
| 2007 | Demattê et al.    | Quantification of tropical soil attributes from ETM+/LANDSAT-7 data                                                                   | International Journal of Remote Sensing               | English    |
| 2007 | Magalhães & Cerri | Yield Monitoring of Sugar Cane                                                                                                        | Biosystems Engineering                                | English    |
| 2008 | Biffi & Rafaeli   | Comportamento espacial de variáveis agrônomicas da maçã 'Fuji' durante dois anos de observações no planalto serrano de Santa Catarina | Revista Brasileira de Fruticultura                    | Portuguese |
| 2008 | Guedes et al.     | Anisotropia no estudo da variabilidade espacial de algumas variáveis químicas do solo                                                 | Revista Brasileira de Ciência do Solo                 | Portuguese |
| 2008 | Medeiros et al.   | Utilização de um veículo aéreo não-tripulado em atividades de imageamento georeferenciado                                             | Ciência Rural                                         | Portuguese |
| 2008 | Barbieri et al.   | Variabilidade espacial de atributos químicos de um argissolo para aplicação de insumos à taxa variável em diferentes formas de relevo | Engenharia Agrícola                                   | Portuguese |
| 2008 | Molin & Castro    | Establishing management zones using soil electrical conductivity and other soil properties by the fuzzy clustering technique          | Scientia Agricola                                     | English    |
| 2008 | Silva et al.      | Avaliação de interpoladores estatísticos e determinísticos na estimativa de atributos do solo em agricultura de precisão              | IDESIA                                                | Portuguese |
| 2008 | Mello & Caimi     | Simulação na validação de sistemas computacionais para a agricultura de precisão                                                      | Revista Brasileira de Engenharia Agrícola e Ambiental | Portuguese |
| 2008 | Campos et al.     | Aplicação de adubo e corretivo após o corte da cana-planta utilizando técnicas geoestatísticas                                        | Ciência Rural                                         | Portuguese |

|      |                       |                                                                                                                                                                      |                                                       |            |
|------|-----------------------|----------------------------------------------------------------------------------------------------------------------------------------------------------------------|-------------------------------------------------------|------------|
| 2008 | Farias et al.         | Spatial analysis of the distribution of <i>Spodoptera frugiperda</i> (J.E. Smith) (Lepidoptera: Noctuidae) and losses in maize crop productivity using geostatistics | Neotropical Entomology                                | English    |
| 2008 | Bazzi et al.          | Influência da distância entre passadas de colhedora equipada com monitor de colheita na precisão dos mapas de produtividade na cultura do milho                      | Engenharia Agrícola                                   | Portuguese |
| 2008 | Monquero et al.       | Mapas de infestação de plantas daninhas em diferentes Sistemas de colheita da cana-de-açúcar                                                                         | Planta Daninha                                        | Portuguese |
| 2008 | da Silva et al.       | Variabilidade espacial de atributos químicos e produtividade da cultura do café em duas safras agrícolas                                                             | Ciência e Agrotecnologia                              | Portuguese |
| 2008 | Povh                  | Comportamento do NDVI obtido por sensor ótico ativo em cereais                                                                                                       | Pesquisa Agropecuária Brasileira                      | Portuguese |
| 2008 | de Sena Júnior et al. | Discriminação entre estágios nutricionais na cultura do trigo com técnicas de visão artificial e medidor portátil de clorofila                                       | Engenharia Agrícola                                   | Portuguese |
| 2008 | Dos Santos et al.     | Gamaespectrometria aplicada em solo agrícola no noroeste do Estado do Rio de Janeiro                                                                                 | Revista Brasileira de Geofísica                       | Portuguese |
| 2009 | Hurtado et al.        | Spatial variability of soil acidity attributes and the spatialization of liming requirement for corn                                                                 | Ciência e Agrotecnologia                              | English    |
| 2009 | Amado et al.          | Atributos químicos e físicos de latossolos e sua relação com os rendimentos de milho e feijão irrigados                                                              | Revista Brasileira de Ciência do Solo                 | Portuguese |
| 2009 | Martins et al.        | Correlação linear e espacial entre a produtividade do feijoeiro e atributos físicos de um LATOSSOLO VERMELHO Distroférico de Selvíria, MS                            | Acta scientiarum-agronomy                             | Portuguese |
| 2009 | Rosa Filho et al.     | Variabilidade da produtividade da soja em função de atributos físicos de um latossolo vermelho distroférico sob plantio direto                                       | Revista Brasileira de Ciência do Solo                 | Portuguese |
| 2009 | Souza et al.          | Índices de vegetação no milho em função da hora do dia e da taxa de nitrogênio aplicada                                                                              | Revista Brasileira de Engenharia Agrícola e Ambiental | Portuguese |
| 2009 | Coelho et al.         | Influência da densidade amostral e do tipo de interpolador na elaboração de mapas temáticos                                                                          | Acta Scientiarum - Agronomy                           | Portuguese |
| 2009 | Grohs et al.          | Modelo para estimativa do potencial produtivo em trigo e cevada por meio do sensor GreenSeeker                                                                       | Engenharia Agrícola                                   | Portuguese |
| 2009 | Motomiya et al.       | Utilização de sensor óptico ativo para detectar deficiência foliar de nitrogênio em algodoeiro                                                                       | Revista Brasileira de Engenharia Agrícola e Ambiental | Portuguese |
| 2009 | Viliotti et al.       | Adaptação de um pulverizador de tração humana para aplicação localizada de herbicidas                                                                                | Planta Daninha                                        | Portuguese |

|      |                       |                                                                                                                                            |                                                       |            |
|------|-----------------------|--------------------------------------------------------------------------------------------------------------------------------------------|-------------------------------------------------------|------------|
| 2009 | Oliveira P. et al.    | Variabilidade espacial de propriedades químicas do solo e da produtividade de citros na Amazônia Oriental                                  | Revista Brasileira de Engenharia Agrícola e Ambiental | Portuguese |
| 2009 | Hurtado et al.        | Variação espacial da resposta do milho à adubação nitrogenada de cobertura em lavoura no cerrado                                           | Pesquisa Agropecuária Brasileira                      | Portuguese |
| 2009 | Lemos et al.          | In situ soil phosphorus monitoring probe compared with conventional extraction procedures                                                  | Communications in Soil Science and Plant Analysis     | English    |
| 2009 | Carvalho Alves et al. | Modeling spatial variability and pattern of rust and brown eye spot in coffee agroecosystem                                                | Journal of Pest Science                               | English    |
| 2009 | Konopatzki et al.     | Spatial variability of yield and other parameters associated with pear trees                                                               | Acta Horticulturae                                    | English    |
| 2009 | Lins et al.           | Detection of citrus canker in citrus plants using laser induced fluorescence spectroscopy                                                  | Precision Agriculture                                 | English    |
| 2010 | de Souza et al.       | Spatial variability of soil attributes and sugarcane yield in relation to topographic location                                             | Revista Brasileira de Engenharia Agrícola e Ambiental | English    |
| 2010 | Cruz et al.           | Análise espacial de atributos físicos e carbono orgânico em argissolo vermelho-amarelo cultivado com cana-de-açúcar                        | Ciência e Agrotecnologia                              | Portuguese |
| 2010 | Molin et al .         | Capacidade de um sensor ótico em quantificar a resposta da cana-de-açúcar a doses de nitrogênio                                            | Revista Brasileira de Engenharia Agrícola e Ambiental | Portuguese |
| 2010 | Zanão et al.          | Variabilidade espacial de atributos químicos em diferentes profundidades em um Latossolo em sistema de plantio direto                      | Revista Ceres                                         | Portuguese |
| 2010 | de Souza et al.       | Análise dos atributos do solo e da produtividade da cultura de cana-de-açúcar com o uso da geoestatística e árvore de decisão              | Ciência Rural                                         | Portuguese |
| 2010 | Machado et al.        | Metodologia para avaliação do desempenho de receptor de GPS de uso agrícola em condição cinemática                                         | Engenharia Agrícola                                   | Portuguese |
| 2010 | Silva et al.          | Efeitos da colheita manual na bienalidade do cafeeiro em Ijaci, Minas Gerais                                                               | Ciência e Agrotecnologia                              | Portuguese |
| 2010 | Gonçalves et al.      | Spatial variability and temporal stability of water storage in a cultivated tropical soil                                                  | Bragantia                                             | English    |
| 2010 | Canafistula           | Investigação de variável adequada ao controle automático de vazão sem uso de sensores em campos irrigados por meio de análise multivariada | Ciência Rural                                         | Portuguese |
| 2010 | Molin et al.          | Test procedure for variable rate fertilizer on coffee                                                                                      | Acta Scientiarum - Agronomy                           | English    |
| 2010 | de Souza et al.       | Espacialização de perdas e da qualidade do feijão em colheita semimecanizada                                                               | Acta Scientiarum - Agronomy                           | Portuguese |
| 2010 | Ragagnin et al.       | Recomendação de calagem a taxa variada sob diferentes intensidades de amostragem                                                           | Revista Brasileira de Engenharia Agrícola e Ambiental | Portuguese |



|      |                         |                                                                                                                                                       |                                                       |            |
|------|-------------------------|-------------------------------------------------------------------------------------------------------------------------------------------------------|-------------------------------------------------------|------------|
| 2010 | Lins et al.             | Optical fiber laser induced fluorescence spectroscopy as a citrus canker diagnostic                                                                   | Applied Optics                                        | English    |
| 2010 | Loureiro et al.         | Spatial variability of microbial biomass and organic matter labile pools in a haplic planosol soil                                                    | Bragantia                                             | English    |
| 2010 | Cirani & Dias de Moraes | Inovação na indústria sucroalcooleira paulista: Os determinantes da adoção das tecnologias de agricultura de precisão                                 | Revista de Economia e Sociologia Rural                | Portuguese |
| 2010 | Zandonadi et al.        | Laboratory performance of a mass flow sensor for dry edible bean harvesters                                                                           | Applied Engineering in Agriculture                    | English    |
| 2011 | Genu & Dematte          | Prediction of soil chemical attributes using optical remote sensing                                                                                   | Acta Scientiarum - Agronomy                           | English    |
| 2011 | Balena et al.           | Use of Fe <sup>3+</sup> Ion Probe to Study Intensively Weathered Soils utilizing Electron Paramagnetic Resonance and Optical Spectroscopy             | Journal of the brazilian chemical society             | English    |
| 2011 | Dematte et al.          | Método geotecnológico integrativo na caracterização de solos desenvolvidos de diferentes materiais de origem                                          | Bragantia                                             | Portuguese |
| 2011 | Neto et al.             | Atributos de solo e cultura espacialmente distribuídos relacionados ao rendimento do milho                                                            | Revista Brasileira de Ciência do Solo                 | Portuguese |
| 2011 | Nanni et al.            | Optimum size in grid soil sampling for variable rate application in site-specific management                                                          | Scientia Agricola                                     | English    |
| 2011 | Silva et al.            | Adoption and use of precision agriculture technologies in the sugarcane industry of São Paulo state, Brazil                                           | Precision Agriculture                                 | English    |
| 2011 | Cruz et al.             | Spatial variability of an Alfisol cultivated with sugarcane                                                                                           | Ciência e Investigação Agraria                        | English    |
| 2011 | Tabile et al.           | Design and development of the architecture of an agricultural mobile robot                                                                            | Engenharia Agrícola                                   | English    |
| 2011 | Molin & Rabello         | Estudos sobre a mensuração da condutividade elétrica do solo                                                                                          | Engenharia Agrícola                                   | Portuguese |
| 2011 | Girardello et al.       | Alterações nos atributos físicos de um latossolo vermelho sob plantio direto induzidas por diferentes tipos de escarificadores e o rendimento da soja | Revista Brasileira de Ciência do Solo                 | Portuguese |
| 2011 | Rosalen et al.          | GPS receivers for georeferencing of spatial variability of soil attributes                                                                            | Engenharia Agrícola                                   | English    |
| 2011 | Suszek et al.           | Determination of management zones from normalized and standardized equivalent productivity maps in the soybean culture                                | Engenharia Agrícola                                   | English    |
| 2011 | Ferraz et al.           | Viabilidade econômica do sistema de adubação diferenciado comparado ao sistema de adubação convencional em lavoura cafeeira: um estudo de caso        | Engenharia Agrícola                                   | Portuguese |
| 2011 | Machado & Molin         | Ensaio estáticos e cinemáticos de receptores de GPS                                                                                                   | Revista Brasileira de Engenharia Agrícola e Ambiental | Portuguese |
| 2011 | Silva et al.            | Spatial variability in nutritional status of arabic coffee based on dris index                                                                        | Revista Ceres                                         | English    |

|      |                     |                                                                                                                                                      |                                           |            |
|------|---------------------|------------------------------------------------------------------------------------------------------------------------------------------------------|-------------------------------------------|------------|
| 2011 | Baio & Moratelli    | Avaliação da acurácia no direcionamento com piloto automático e contraste da capacidade de campo operacional no plantio mecanizado da cana-de-açúcar | Engenharia Agrícola                       | Portuguese |
| 2011 | Monquero et al.     | Monitoramento do banco de sementes de plantas daninhas em áreas com Cana-de-Açúcar colhida mecanicamente                                             | Planta Daninha                            | Portuguese |
| 2011 | Dalchiavon et al.   | Produtividade da soja e resistência mecânica à penetração do solo sob sistema plantio direto no cerrado brasileiro                                   | Pesquisa agropecuaria brasileira          | Portuguese |
| 2011 | Sonda & Bortoluzzi  | Viabilidade técnica do uso de receptores GPS de navegação para fins de amostragem sistemática de solo                                                | Revista Brasileira de Ciência do Solo     | Portuguese |
| 2011 | Mattioni et al.     | Variabilidade espacial da produtividade e da qualidade das sementes de soja em um campo de produção                                                  | Revista Brasileira de Sementes            | Portuguese |
| 2011 | de Leão et al.      | Terrain forms and spatial variability of soil properties in an area cultivated with citrus                                                           | Engenharia Agrícola                       | English    |
| 2011 | do Amaral & Molin   | Sensor óptico no auxílio à recomendação de adubação nitrogenada em cana-de-açúcar                                                                    | Pesquisa Agropecuária Brasileira          | Portuguese |
| 2011 | Hurtado et al.      | Clorofilômetro no ajuste da adubação nitrogenada em cobertura para o milho de alta produtividade                                                     | Ciência Rural                             | Portuguese |
| 2011 | Grohs et al.        | Validação de modelo para predição do potencial produtivo de trigo com sensor óptico ativo                                                            | Pesquisa Agropecuária Brasileira          | Portuguese |
| 2011 | Oliveira & Molin    | Uso de piloto automático na implantação de pomares de citros                                                                                         | Engenharia Agrícola                       | Portuguese |
| 2011 | Reynaldo & Molin    | Proposta metodológica para avaliação de controlador automático de seções e pulverização                                                              | Engenharia Agrícola                       | Portuguese |
| 2011 | Sousa Junior et al. | Modelos espectrais terrestres e orbitais na determinação de teores de atributos dos solos: Potencial e custos                                        | Bragantia                                 | Portuguese |
| 2011 | Pereira et al.      | Laser-induced fluorescence imaging method to monitor citrus greening disease                                                                         | Computers and Electronics in Agriculture  | English    |
| 2011 | Genú e Dematte.     | Predição de atributos químicos do solo utilizando sensoriamento remoto ótico                                                                         | Acta Scientiarum - Agronomy               | English    |
| 2011 | Montanari et al.    | Variability of the features of a red latosol on direct yield in a Brazilian cerrado and soybean productivity                                         | Cadernos do Laboratorio Xeoloxico de Laxe | English    |
| 2011 | Bizari et al.       | Haste portátil para utilização de sondas de TDR em ensaios de campo                                                                                  | Irriga                                    | Portuguese |
| 2011 | Filho et al.        | Variabilidade espacial de propriedades dendrométricas do eucalipto e de atributos físicos de um Latossolo Vermelho                                   | Bragantia                                 | Portuguese |

|      |                       |                                                                                                                                          |                                                       |            |
|------|-----------------------|------------------------------------------------------------------------------------------------------------------------------------------|-------------------------------------------------------|------------|
| 2011 | Zamberlan & Zamberlan | Irrigação: Gerenciamento de custos como ferramenta na tomada de decisão                                                                  | Revista em Agronegocio e Meio Ambiente                | English    |
| 2011 | Bottega et al.        | Variabilidade espacial da resistência do solo à penetração em um latossolo vermelho distroférico                                         | Revista brasileira de Ciência agrárias                | Portuguese |
| 2011 | Molin et al .         | Orange yield and plant gap mapping caused by disease                                                                                     | Precision Agriculture                                 | English    |
| 2011 | Alves et al.          | Geostatistical analysis of the spatial variation of the berry borer and leaf miner in a coffee agroecosystem                             | Precision Agriculture                                 | English    |
| 2012 | Baio                  | Evaluation of an auto-guidance system operating on a sugar cane harvester                                                                | Precision Agriculture                                 | English    |
| 2012 | Molin et al.          | Yield mapping, soil fertility and tree gaps in an orange orchard                                                                         | Revista Brasileira de Fruticultura                    | English    |
| 2012 | Delalibera et al.     | Management zones in agriculture according to the soil and landscape variables                                                            | Engenharia Agrícola                                   | English    |
| 2012 | Carvalho et al.       | Produtividade de madeira do eucalipto correlacionada com atributos do solo visando ao mapeamento de zonas específicas de manejo          | Ciência Rural                                         | Portuguese |
| 2012 | Rodrigues et al.      | Soil sampling intensity and spatial distribution pattern of soils attributes and corn yield in no-tillage system                         | Engenharia Agrícola                                   | English    |
| 2012 | Dalchiavon et al.     | Variabilidade espacial de atributos da fertilidade de um Latossolo Vermelho Distroférico sob Sistema Plantio Direto                      | Revista Ciência Agronômica                            | Portuguese |
| 2012 | da Silva et al.       | Classificação numérica e modelo digital de elevação na caracterização espacial de atributos dos solos                                    | Revista Brasileira de Engenharia Agrícola e Ambiental | Portuguese |
| 2012 | Cerri & Magalhães     | Correlation of physical and chemical attributes of soil with sugarcane yield                                                             | Pesquisa Agropecuária Brasileira                      | English    |
| 2012 | Ferraz et al.         | Geostatistical analysis of fruit yield and detachment force in coffee                                                                    | Precision Agriculture                                 | English    |
| 2012 | Dalchiavon & Carvalho | Correlação linear e espacial dos componentes de produção e produtividade da soja                                                         | Semina-Ciências Agrarias                              | Portuguese |
| 2012 | Santi et al.          | Infiltração de água no solo, determinada por diferentes métodos como indicado do potencial produtivo de dois latossolos manejados com AP | Interciência                                          | Portuguese |
| 2012 | Valente et al.        | The relationship between apparent soil electrical conductivity and soil properties                                                       | Ciência Agronomica                                    | English    |
| 2012 | Silva Jr et al.       | Weed mapping using a machine vision system                                                                                               | Planta Daninha                                        | English    |
| 2012 | Silva et al.          | Multivariate analysis and geostatistics of the fertility of a humic rhodic hapludox under coffee cultivation                             | Revista Brasileira de Ciência do Solo                 | English    |
| 2012 | Roccia et al.         | Experimental evaluation of the performance of a wireless sensor network in agricultural environments                                     | Engenharia Agrícola                                   | English    |

|      |                   |                                                                                                                                    |                                                       |            |
|------|-------------------|------------------------------------------------------------------------------------------------------------------------------------|-------------------------------------------------------|------------|
| 2012 | Santi et al.      | Análise de componentes principais de atributos químicos e físicos do solo limitantes à produtividade de grãos                      | Pesquisa Agropecuária Brasileira                      | Portuguese |
| 2012 | Merotto et al.    | Reflectance indices as a diagnostic tool for weed control performed by multipurpose equipment in precision agriculture             | Planta Daninha                                        | English    |
| 2012 | Sales et al.      | Spatial relationships between soil attributes and corn yield in no-tillage system                                                  | Revista Brasileira de Ciência do Solo                 | English    |
| 2012 | Ferraz et al.     | Variabilidade espacial e temporal do fósforo, potássio e da produtividade de uma lavoura cafeeira                                  | Engenharia Agrícola                                   | Portuguese |
| 2012 | Riffel et al.     | Densidade amostral aplicada ao monitoramento georreferenciado de lagartas desfolhadoras na cultura da soja                         | Ciência Rural                                         | Portuguese |
| 2012 | Rossato et al.    | Sensores de reflectância e fluorescência na avaliação de teores de nitrogênio, produção de biomassa e produtividade do algodoeiro  | Pesquisa Agropecuária Brasileira                      | Portuguese |
| 2012 | Mondo et al.      | Spatial variability of soil fertility and its relationship with seed physiological potential in a soybean production area          | Revista Brasileira de Sementes                        | English    |
| 2012 | Spezia et al.     | Model to estimate the sampling density for establishment of yield mapping                                                          | Revista Brasileira de Engenharia Agrícola e Ambiental | English    |
| 2012 | Sanchez et al.    | Mapeamento das formas do relevo para estimativa de custos de fertilização em cana-de-açúcar                                        | Engenharia Agrícola                                   | Portuguese |
| 2012 | Garcia et al.     | Auger-type granular fertilizer distributor: mathematical model and dynamic simulation                                              | Engenharia Agrícola                                   | English    |
| 2012 | Portz et al.      | Active crop sensor to detect variability of nitrogen supply and biomass on sugarcane fields                                        | Precision Agriculture                                 | English    |
| 2012 | Colaço et al.     | Energy assessment for variable rate nitrogen application                                                                           | Agricultural Engineering International: CIGR Journal  | English    |
| 2012 | Ferraz et al.     | Agricultura de precisão no estudo de atributos químicos do solo e da produtividade de lavoura cafeeira                             | Coffee Science                                        | Portuguese |
| 2012 | Montanari et al.  | The use of scaled semivariograms to plan soil sampling in sugarcane fields                                                         | Precision Agriculture                                 | English    |
| 2012 | Godoy et al.      | Networked control system for the guidance of a four-wheel steering agricultural robotic platform                                   | Journal of Control Science and Engineering            | English    |
| 2012 | Sanchez et al.    | Delineation of specific management areas for coffee cultivation based on the soil-relief relationship and numerical classification | Precision Agriculture                                 | English    |
| 2013 | Bragagnolo et al. | Optical crop sensor for variable-rate nitrogen fertilization in corn I - plant nutrition and dry matter production                 | Revista Brasileira de Ciência do Solo                 | Portuguese |

|      |                   |                                                                                                                            |                                                       |            |
|------|-------------------|----------------------------------------------------------------------------------------------------------------------------|-------------------------------------------------------|------------|
| 2013 | Horbe et al.      | Optimization of corn plant population according to management zones in Southern Brazil                                     | Precision Agriculture                                 | English    |
| 2013 | Rodrigues et al.  | Correlation Between Chemical Soil Attributes and Sugarcane Quality Parameters According to Soil Texture Zones              | Soil Science                                          | English    |
| 2013 | de Souza et al.   | Influence of the eucalyptus windbreaks aerodynamic system on the soybean crop in West of Parana, Brazil                    | Journal of food agriculture & environment             | English    |
| 2013 | Bragagnolo et al. | Optical crop sensor for variable-rate nitrogen fertilization in corn: II - indices of fertilizer efficiency and corn yield | Revista Brasileira de Ciência do Solo                 | English    |
| 2013 | Kramer et al.     | Wheat yield and physical properties of a brown latosol under no-tillage in south-central Paraná                            | Revista Brasileira de Ciência do Solo                 | English    |
| 2013 | Pereira et al.    | Optimization of the sampling scheme for maps of physical and chemical properties estimated by kriging                      | Revista Brasileira de Ciência do Solo                 | English    |
| 2013 | Bazzi et al.      | Management zones definition using soil chemical and physical attributes in a soybean area                                  | Engenharia Agrícola                                   | English    |
| 2013 | Dalchiavon et al. | Strategy of specification of management areas: rice grain yield as related to soil fertility                               | Revista Brasileira de Ciência do Solo                 | English    |
| 2013 | Molin & Faulin    | Spatial and temporal variability of soil electrical conductivity related to soil moisture                                  | Scientia Agrícola                                     | English    |
| 2013 | do Prado et al.   | Influência local em um modelo espacial linear da produtividade da soja utilizando distribuição t-Student                   | Engenharia Agrícola                                   | Portuguese |
| 2013 | Zanzarini et al.  | Correlação espacial do índice de vegetação (NDVI) de imagem Landsat/ETM+ com atributos do solo                             | Revista Brasileira de Engenharia Agrícola e Ambiental | Portuguese |
| 2013 | Caon & Genu       | Mapeamento de atributos químicos em diferentes densidades amostrais e influência na adubação e calagem                     | Revista Brasileira de Engenharia Agrícola e Ambiental | Portuguese |
| 2013 | Montanari et al.  | Produção de matéria seca da braquiária de acordo com os atributos químicos de um Latossolo em Selvíria, Mato Grosso do Sul | Revista Ceres                                         | Portuguese |
| 2013 | Bredemeier et al. | Estimativa do potencial produtivo em trigo utilizando sensor óptico ativo para adubação nitrogenada em taxa variável       | Ciência Rural                                         | Portuguese |
| 2013 | Bottega et al.    | Variabilidade espacial de atributos do solo em sistema de semeadura direta com rotação de culturas no cerrado brasileiro   | Revista Ciência Agronomica                            | Portuguese |
| 2013 | Abrahão et al.    | Determination of nitrogen and chlorophyll levels in bean-plant leaves by using spectral vegetation bands and indices       | Revista Ciência Agronomica                            | English    |

|      |                   |                                                                                                                                                              |                                                               |            |
|------|-------------------|--------------------------------------------------------------------------------------------------------------------------------------------------------------|---------------------------------------------------------------|------------|
| 2013 | Dalchiavon et al. | Sugarcane productivity correlated with physical-chemical attributes to create soil management zone                                                           | Revista Ceres                                                 | English    |
| 2013 | Spekken & Bruin   | Optimized routing on agricultural fields by minimizing maneuvering and servicing time                                                                        | Precision Agriculture                                         | English    |
| 2013 | Silva et al.      | Yield mapping of arabic coffee and their relationship with plant nutritional status                                                                          | Journal of Soil Science and Plant Nutrition                   | English    |
| 2013 | Rodrigues et al.  | Soil attributes and leaf nitrogen estimating sugar cane quality parameters: Brix, pol and fibre                                                              | Precision Agriculture                                         | English    |
| 2013 | Araújo et al.     | Analysing the effects of applying agricultural lime to soils by VNIR spectral sensing: A quantitative and quick method                                       | International Journal of Remote Sensing                       | English    |
| 2013 | Zandonadi et al.  | Evaluating field shape descriptors for estimating off-target application area in agricultural fields                                                         | Computers and Electronics in Agriculture                      | English    |
| 2013 | Sanchez et al.    | Delineation of specific management areas for coffee cultivation based on the soil-relief relationship and numerical classification                           | Precision Agriculture                                         | English    |
| 2013 | Santi et al.      | Definição de zonas de produtividade em áreas manejadas com agricultura de precisão                                                                           | Revista Brasileira de Ciências Agrárias                       | Portuguese |
| 2014 | Ferraz et al.     | Variabilidade espacial da força de desprendimento de frutos do cafeeiro                                                                                      | Engenharia Agrícola                                           | Portuguese |
| 2014 | Sana et al.       | Variabilidade espacial de atributos físico-químicos do solo e seus efeitos na produtividade do algodoeiro                                                    | Revista Brasileira de Engenharia Agrícola e Ambiental         | Portuguese |
| 2014 | Silva et al.      | Coffee quality and its relationship with Brix degree and colorimetric information of coffee cherries                                                         | Precision Agriculture                                         | English    |
| 2014 | Cherubin et al.   | Sampling grids used to characterise the spatial variability of pH, Ca, Mg and V% in Oxisols                                                                  | Revista Ciência Agronomica                                    | English    |
| 2014 | Nascimento et al. | Zonas homogêneas de atributos do solo para o manejo de irrigação em pomar de videira                                                                         | Revista Brasileira de Ciência do Solo                         | Portuguese |
| 2014 | Girardello et al. | Resistência à penetração, eficiência de escarificadores mecânicos e produtividade da soja em Latossolo argiloso manejado sob plantio direto de longa duração | Revista Brasileira de Ciência do Solo                         | Portuguese |
| 2014 | Brandao et al.    | Spectral reflectance of satellite images using geostatistics methods to estimate growth and cotton yield                                                     | Remote sensing for agriculture, ecosystems, and hydrology xvi | English    |
| 2014 | da Silva et al.   | Métodos geoestatísticos na modelagem espacial do diâmetro médio do cristal da goethita                                                                       | Revista Brasileira de Engenharia Agrícola e Ambiental         | Portuguese |

|      |                     |                                                                                                                                                   |                                                       |            |
|------|---------------------|---------------------------------------------------------------------------------------------------------------------------------------------------|-------------------------------------------------------|------------|
| 2014 | Kramer et al.       | Atributos químicos do solo associados à produtividade do trigo em um talhão com diferentes potenciais produtivos                                  | Revista Brasileira de Ciência do Solo                 | Portuguese |
| 2014 | Weirich Neto et al. | Automatic and manual spray bar sections control                                                                                                   | Engenharia Agrícola                                   | English    |
| 2014 | Costa et al.        | Produtividade de laranja correlacionada com atributos químicos do solo visando a zonas específicas de manejo                                      | Pesquisa Agropecuaria Tropical                        | Portuguese |
| 2014 | Valente et al.      | Spatial variability of apparent electrical conductivity and soil properties in a coffee production field                                          | Engenharia Agrícola                                   | English    |
| 2014 | Nagahama et al.     | Dinâmica e variabilidade espacial de plantas daninhas em sistemas de mobilização do solo em sorgo forrageiro                                      | Planta Daninha                                        | Portuguese |
| 2014 | Zonta et al.        | Variabilidade espacial da fertilidade do solo em área cultivada com algodoeiro no Cerrado do Brasil                                               | Revista Brasileira de Engenharia Agrícola e Ambiental | Portuguese |
| 2014 | Bernardi et al.     | Variabilidade espacial de parâmetros físico-químicas do solo e biofísicos de superfície em cultivo do sorgo                                       | Revista Brasileira de Engenharia Agrícola e Ambiental | Portuguese |
| 2014 | Dematte et al .     | Precision agriculture for sugarcane management: a strategy applied for brazilian conditions                                                       | Acta Scientiarum - Agronomy                           | English    |
| 2014 | de Souza et al.     | Número de amostras na análise geoestatística e na krigagem de mapas de atributos do solo                                                          | Ciência Rural                                         | Portuguese |
| 2014 | Boechat et al.      | Detecção do mofo-branco no feijoeiro, utilizando características espectrais                                                                       | Revista Ceres                                         | Portuguese |
| 2014 | Cherubin et al.     | Eficiência de malhas amostrais utilizadas na caracterização da variabilidade espacial de fósforo e potássio                                       | Ciência Rural                                         | Portuguese |
| 2014 | Siqueira et al.     | Sampling density and proportion for the characterization of the variability of Oxisol attributes on different materials                           | Geordema                                              | English    |
| 2014 | Marques et al.      | Magnetic susceptibility and diffuse reflectance spectroscopy to characterize the spatial variability of soil properties in a brazilian haplustalf | Geordema                                              | English    |
| 2014 | Sartin et al.       | Image segmentation with artificial neural network for nutrient deficiency in cotton crop                                                          | Journal of Computer Science                           | English    |
| 2014 | Da Silva et al.     | A new approach to soil classification mapping based on the spatial distribution of soil properties                                                | Geordema                                              | English    |
| 2014 | Florindo et al.     | Brachiaria species identification using imaging techniques based on fractal descriptors                                                           | Computers and Electronics in Agriculture              | English    |
| 2014 | Santos et al.       | Computational simulation of wireless sensor networks for pesticide drift control                                                                  | Precision Agriculture                                 | English    |

|      |                      |                                                                                                                                                 |                                                       |            |
|------|----------------------|-------------------------------------------------------------------------------------------------------------------------------------------------|-------------------------------------------------------|------------|
| 2014 | Colaço et al.        | A model to analyze as-applied reports from variable rate applications                                                                           | Precision Agriculture                                 | English    |
| 2014 | Santi et al.         | Phytosociological variability of weeds in soybean field                                                                                         | Planta Daninha                                        | English    |
| 2015 | Santos et al.        | Sampling of subterranean termites <i>Syntermes</i> spp. (Isoptera: Termitidae) in a eucalyptus plantation using point process and geostatistics | Precision Agriculture                                 | English    |
| 2015 | Rodrigues & Cora     | Management zones using fuzzy clustering based on spatial-temporal variability of soil and corn yield                                            | Engenharia Agrícola                                   | English    |
| 2015 | Marteli & Piroli     | Análise do desempenho de interpoladores para a elaboração de mapas de pH para a agricultura familiar                                            | Applied Research & Agrotechnology                     | Portuguese |
| 2015 | Siqueira et al.      | Spatial distribution of soil apparent electrical conductivity measured by electromagnetic induction and sugarcane yield                         | Bragantia                                             | English    |
| 2015 | Correa et al.        | Aspects of the Silvopastoral System Correlated with properties of a typic Quartzipsamment (Entisol) in Mato Grosso do Sul, Brazil               | Revista Brasileira de Ciência do Solo                 | English    |
| 2015 | da Silva S. et al.   | Variabilidade de atributos Físicos e Químicos do solo e Produção de feijoeiro cultivado em Sistema de cultivo mínimo com Irrigação              | Revista Brasileira de Ciência do Solo                 | Portuguese |
| 2015 | Cherubin et al.      | Dimensão da malha amostral para caracterização da variabilidade espacial de fósforo e potássio em Latossolo Vermelho                            | Revista Agropecuária Brasileira                       | Portuguese |
| 2015 | Neto et al.          | Integrating forest-pasture: Spatial analysis and delineation of zones of litter production and nutrient return                                  | Semina-Ciências Agrárias                              | English    |
| 2015 | Soares Filho & Cunha | Agricultura de precisão: particularidades de sua adoção no sudoeste de Goiás – Brasil                                                           | Engenharia Agrícola                                   | Portuguese |
| 2015 | Bernardi et al.      | Ferramentas de agricultura de precisão como auxílio ao manejo da fertilidade do solo                                                            | Cadernos Ciência e Tecnologia                         | Portuguese |
| 2015 | Machado et al.       | Estimativa de severidade do mofo-branco em lavouras de feijão utilizando-se sensores hiper e multiespectral                                     | Revista Brasileira de Engenharia Agrícola e Ambiental | Portuguese |
| 2015 | Camicia et al.       | Selection grids for weed mapping                                                                                                                | Planta Daninha                                        | English    |
| 2015 | Machado et al.       | Estimativa de gasto energético da operação de subsolagem em profundidades variáveis                                                             | Revista Brasileira de Engenharia Agrícola e Ambiental | Portuguese |
| 2015 | Leal et al.          | Redes neurais artificiais na predição da produtividade de milho e definição de sítios de manejo diferenciado por meio de atributos do solo      | Bragantia                                             | Portuguese |
| 2015 | Gleber et al.        | Spatial influence of physical and chemical parameters on management zone definition in apple orchards                                           | Engenharia Agrícola                                   | English    |
| 2015 | Rosa et al.          | Sugarcane response to nitrogen rates, measured by a canopy reflectance sensor                                                                   | Pesquisa Agropecuária Brasileira                      | English    |



|      |                  |                                                                                                                                 |                                           |            |
|------|------------------|---------------------------------------------------------------------------------------------------------------------------------|-------------------------------------------|------------|
| 2015 | Bazzi et al.     | Profit maps for precision agriculture                                                                                           | Ciência e Investigação Agrária            | English    |
| 2015 | Neto et al.      | Distribuição espacial da qualidade fisiológica de sementes de soja em campo de produção                                         | Revista Caatinga                          | Portuguese |
| 2015 | Bueno et al.     | Comportamento espacial das variáveis produção, volume de copa e diâmetro de caule da variedade maxi gala                        | Revista Brasileira de Fruticultura        | Portuguese |
| 2015 | Bernardi et al.  | Estratégias de comunicação em agricultura de precisão                                                                           | Revista em Ciência da Informação          | Portuguese |
| 2015 | Valmir et al.    | Manejo de lagartas na cultura da soja com aplicação de controle localizado                                                      | Revista Ciência e Tecnologia da América   | Portuguese |
| 2015 | Machado et al.   | Acurácia e tempos de resposta de máquinas para aplicação de defensivos agrícolas à taxa variável                                | Ciência Rural                             | Portuguese |
| 2015 | Machado et al.   | Acurácia das semeadoras-adubadoras à taxa variável                                                                              | Ciência Rural                             | Portuguese |
| 2015 | Araújo et al.    | Determining soil properties in Amazonian Dark Earths by reflectance spectroscopy                                                | Geordema                                  | English    |
| 2015 | Martins & Galo   | Caracterização espectral da cana-de-açúcar infectada por nematóides e <i>migdolus fryanus</i> por espectrorradiometria de campo | Boletim de Ciências Geodésicas            | Portuguese |
| 2015 | Santos & Saraiva | A Reference Process for Management Zones Delineation in Precision Agriculture                                                   | IEEE Latin America Transactions           | English    |
| 2015 | Siqueira et al.  | Detailed mapping unit design based on soil-landscape relation and spatial variability of magnetic susceptibility and soil color | Catena                                    | English    |
| 2015 | Camargo et al.   | Mapping of clay, iron oxide and adsorbed phosphate in Oxisols using diffuse reflectance spectroscopy                            | Geordema                                  | English    |
| 2015 | Castilhos et al. | X-ray fluorescence and gamma-ray spectrometry combined with multivariate analysis for topographic studies in agricultural soil  | Applied Radiation and Isotopes            | English    |
| 2015 | Guerra et al.    | Direct analysis of plant leaves by EDXRF and LIBS: microsampling strategies and cross-validation                                | Journal of Analytical Atomic Spectrometry | English    |
| 2015 | Terra et al.     | Spectral libraries for quantitative analyses of tropical Brazilian soils: Comparing vis-NIR and mid-IR reflectance data         | Geordema                                  | English    |
| 2015 | Bazzi et al.     | Management zones applied to pear orchard                                                                                        | Journal of food agriculture & environment | English    |
| 2015 | Ferraz et al.    | Variabilidade espacial da dose de P2O5 E K2O para adubação diferenciada e convencional em lavoura cafeeira                      | Coffee Science                            | Portuguese |

|      |                       |                                                                                                                   |                                                       |            |
|------|-----------------------|-------------------------------------------------------------------------------------------------------------------|-------------------------------------------------------|------------|
| 2015 | De Castro Pias et al. | Mapeamento da produção de massa seca do Tifton 85 e sua correlação com os atributos químicos do solo              | Semina-Ciências Agrárias                              | Portuguese |
| 2015 | Machado et al.        | Spatial dependence of electrical conductivity and chemical properties of the soil by electromagnetic induction    | Revista Brasileira de Ciência do Solo                 | English    |
| 2015 | Amaral et al.         | Comparison of crop canopy reflectance sensors used to identify sugarcane biomass and nitrogen status              | Precision Agriculture                                 | English    |
| 2016 | Freitas et al.        | Spatial distribution of Yellow Sigatoka Leaf Spot correlated with soil fertility and plant nutrition              | Precision Agriculture                                 | English    |
| 2016 | Bottega et al.        | Spatial and temporal distribution of weeds in no-tillage system                                                   | Revista Brasileira de Engenharia Agrícola e Ambiental | English    |
| 2016 | Oldoni & Bassoi       | Delineation of irrigation management zones in a Quartzipsamment of the Brazilian semiarid region                  | Pesquisa Agropeária Brasileira                        | English    |
| 2016 | Corassa et al.        | Espacialização em alta resolução de atributos da acidez de Latossolo por meio de sensoriamento em tempo real      | Pesquisa Agropeária Brasileira                        | Portuguese |
| 2016 | Cunha & Soares        | Broadcast Distribution Uniformity of fertilizer with centrifugal spreaders used in variable rate application      | Engenharia Agrícola                                   | English    |
| 2016 | Machado & Lanças      | Phototype for Soil Mechanical Resistance Measurement with chisel plow automated control                           | Engenharia Agrícola                                   | English    |
| 2016 | Pavlu & Molin         | A sampling plan and spatial distribution for site-specific control of <i>Sphenophorus levis</i> in sugarcane      | Acta Scientiarum - Agronomy                           | English    |
| 2016 | Damian et al.         | Delineating management zones for precision agriculture applications: a case study on wheat in sub-tropical Brazil | Italian Journal of Agronomy                           | English    |
| 2016 | Rocha et al.          | Correlação e dependência espacial de atributos do solo, índice de clorofila e produtividade do milho              | Revista de Ciência y Tecnologia                       | Portuguese |
| 2016 | Garcia et al.         | Manobras de semeadura com sistema de navegação                                                                    | Engenharia Agrícola                                   | Portuguese |
| 2016 | Barros et al.         | Performance of a variable-rate distribution system for simultaneous fertilizer application                        | Revista Brasileira de Engenharia Agrícola e Ambiental | English    |
| 2016 | Bragagnolo et al.     | Use efficiency of variable rate of nitrogen prescribed by optical sensor in corn                                  | Revista Ceres                                         | English    |
| 2016 | Peloia & Rodrigues    | Identification of commercial blocks of outstanding performance of sugarcane using data mining                     | Engenharia Agrícola                                   | English    |
| 2016 | Neto et al.           | Spatial distribution of the chemical properties of the soil and of soybean yield in the field                     | Revista Ciência Agronômica                            | English    |

|      |                          |                                                                                                                                                 |                                                |            |
|------|--------------------------|-------------------------------------------------------------------------------------------------------------------------------------------------|------------------------------------------------|------------|
| 2016 | Ricardo et al.           | Redundant variables and the quality of management zones                                                                                         | Engenharia Agrícola                            | English    |
| 2016 | Vian et al.              | Variabilidade espacial da produtividade de milho irrigado e sua correlação com variáveis explicativas de planta                                 | Ciência Rural                                  | Portuguese |
| 2016 | Gavioli et al.           | Optimization of management zone delineation by using spatial principal components                                                               | Computers and Electronics in Agriculture       | English    |
| 2016 | de Assis Silva           | Mapping the potential beverage quality of coffee produced in the Zona da Mata, Minas Gerais, Brazil                                             | Journal of the Science of Food and Agriculture | English    |
| 2016 | Johann et al.            | Soil moisture modeling based on stochastic behavior of forces on a no-till chisel opener                                                        | Computers and Electronics in Agriculture       | English    |
| 2016 | Souza et al.             | Interpolation type and data computation of crop yield maps is important for precision crop production                                           | Journal of Plant Nutrition                     | English    |
| 2016 | Gasparin et al.          | Three-dimensional maps of equatorial diameter and fruit juice yield in an orange orchard                                                        | Journal of food agriculture & environment      | English    |
| 2016 | Mathias et al.           | BRNeural - Artificial neural networks simulator with topology multilayer perceptron using the encog framework                                   | IEEE Latin America Transactions                | English    |
| 2016 | da Silva Carneiro et al. | Diagnóstico da variabilidade espacial e manejo da fertilidade do solo no cerrado                                                                | Scientia Agraria                               | Portuguese |
| 2016 | Ponti et al.             | Precision Agriculture: Using Low-Cost Systems to Acquire Low-Altitude Images                                                                    | IEEE Computer Graphics and Applications        | English    |
| 2016 | Spekken et al.           | Planning machine paths and row crop patterns on steep surfaces to minimize soil erosion                                                         | Computers and Electronics in Agriculture       | English    |
| 2016 | Maldonado & Barbosa      | Automatic green fruit counting in orange trees using digital images                                                                             | Computers and Electronics in Agriculture       | English    |
| 2016 | Driemeier et al.         | A computational environment to support research in sugarcane agriculture                                                                        | Computers and Electronics in Agriculture       | English    |
| 2016 | Carvalho et al.          | Cacao crop management zones determination based on soil properties and crop yield                                                               | Revista brasileira de Ciência do solo          | English    |
| 2016 | Bernardi et al.          | Spatial variability of soil properties and yield of a grazed alfalfa pasture in Brazil                                                          | Precision Agriculture                          | English    |
| 2016 | Santos et al.            | Sampling of subterranean termites <i>Syntermes</i> spp. (Isoptera: Termitidae) in a eucalyptus plantation using point process and geostatistics | Precision Agriculture                          | English    |
| 2017 | Dematte et al.           | Chemometric soil analysis on the determination of specific bands for the detection of magnesium and potassium by spectroscopy                   | Geoderma                                       | English    |

|      |                    |                                                                                                                                           |                                                                                  |            |
|------|--------------------|-------------------------------------------------------------------------------------------------------------------------------------------|----------------------------------------------------------------------------------|------------|
| 2017 | Amaral et al.      | Canopy sensor placement for variable-rate nitrogen application in sugarcane field                                                         | Precision Agriculture                                                            | English    |
| 2017 | Carneiro et al.    | Mechanized fertilization: individual application of nitrogen, phosphorus and potassium in sugarcane                                       | Revista Ciência Agronômica                                                       | English    |
| 2017 | Trevisan et al.    | Variabilidade de atributos físicos do solo e do arroz cultivado sob plantas de cobertura em sistema de integração lavoura-pecuária        | Bragantia                                                                        | Portuguese |
| 2017 | Ramos et al.       | Defining management zones based on soil attributes and soybean productivity                                                               | Revista Caatinga                                                                 | English    |
| 2017 | Carvalho et al.    | Geostatistical analysis of Arabic coffee yield in two crop seasons                                                                        | Revista Brasileira de Engenharia Agrícola e Ambiental                            | English    |
| 2017 | Dalchiavon et al.  | Production and quality of Urochloa decumbens (stapf) r.d.webster forage co-related to the physical and chemical properties of the soil    | Revista Ceres                                                                    | English    |
| 2017 | Dos Santos et al.  | Spatial variability of soil fertility and its relationship with cocoa yield                                                               | Revista Brasileira de Engenharia Agrícola e Ambiental                            | English    |
| 2017 | Ferraz et al.      | Variabilidade espacial dos atributos da planta de uma lavoura cafeeira                                                                    | Revista Ciência Agronômica                                                       | Portuguese |
| 2017 | Jacintho et al.    | Management zones in coffee cultivation                                                                                                    | Revista Brasileira de Engenharia Agrícola e Ambiental                            | English    |
| 2017 | Souza et al.       | Using passive and active multispectral sensors on the correlation with the phenological indices of cotton                                 | Engenharia Agrícola                                                              | English    |
| 2017 | Beneduzzi et al.   | Temporal variability in active reflectance sensor-measured ndvi in soybean and wheat crops                                                | Engenharia Agrícola                                                              | English    |
| 2017 | Schemberger et al. | Data mining for the assessment of management areas in precision agriculture                                                               | Engenharia Agrícola                                                              | English    |
| 2017 | Baio et al.        | Financial analysis of the investment in precision agriculture techniques on cotton crop                                                   | Engenharia Agrícola                                                              | English    |
| 2017 | Crusiol et al.     | NDVI variation according to the time of measurement, sampling size, positioning of sensor and water regime in different soybean cultivars | Precision Agriculture                                                            | English    |
| 2017 | Moriya et al.      | Mapping Mosaic Virus in Sugarcane Based on Hyperspectral Images                                                                           | IEEE Journal of Selected Topics in Applied Earth Observations and Remote Sensing | English    |
| 2017 | De Souza et al.    | Height estimation of sugarcane using an unmanned aerial system (UAS) based on structure from motion (SfM) point clouds                    | International Journal of Remote Sensing                                          | English    |
| 2017 | da Silva et al.    | Liquid fertilizer application to ratoon cane using a soil punching method                                                                 | Soil and Tillage Research                                                        | English    |

|      |                      |                                                                                                                                           |                                                                             |            |
|------|----------------------|-------------------------------------------------------------------------------------------------------------------------------------------|-----------------------------------------------------------------------------|------------|
| 2017 | Bier & De Souza      | Interpolation selection index for delineation of thematic maps                                                                            | Computers and Electronics in Agriculture                                    | English    |
| 2017 | Demattê et al.       | Soil class and attribute dynamics and their relationship with natural vegetation based on satellite remote sensing                        | Geordema                                                                    | English    |
| 2017 | Alba et al.          | Geotechnologies and soil mapping for delimitation of management zones as an approach to precision viticulture                             | Applied and Environmental Soil Science                                      | English    |
| 2017 | Colaço & Molin       | Variable rate fertilization in citrus: a long term study                                                                                  | Precision Agriculture                                                       | English    |
| 2017 | Colaço et al.        | A Method to Obtain Orange Crop Geometry Information Using a Mobile Terrestrial Laser Scanner and 3D Modeling                              | Remote Sensing                                                              | English    |
| 2017 | Damian et al.        | Monitoring variability in cash-crop yield caused by previous cultivation of a cover crop under a no-tillage system                        | Computers and Electronics in Agriculture                                    | English    |
| 2017 | Melo et al.          | Zonas de manejo em função de propriedades de solo, relevo e produtividade da lavoura cafeeira                                             | Revista Agroambiental                                                       | Portuguese |
| 2017 | Schenatto et al.     | Normalization of data for delineating management zones                                                                                    | Computers and Electronics in Agriculture                                    | English    |
| 2017 | Martins et al.       | Detecting and Mapping Root-Knot Nematode Infection in Coffee Crop Using Remote Sensing Measurements                                       | Journal Of Selected Topics In Applied Earth Observations And Remote Sensing | English    |
| 2017 | Pias et al.          | Sampling grids for monitoring Euschistus heros infestation in soybean                                                                     | Bragantia                                                                   | English    |
| 2017 | Kuiawski et al.      | Vegetation indexes and delineation of management zones for soybean                                                                        | Pesquisa Agropecuária Tropical                                              | English    |
| 2017 | Morona et al.        | Quick analysis of organic matter in soil by energy-dispersive X-ray fluorescence and multivariate analysis                                | Applied Radiation and Isotopes                                              | English    |
| 2017 | da Silva & Magalhães | A liquid injection dosing system for site-specific fertiliser management                                                                  | Biosystems Engineering                                                      | English    |
| 2017 | Teixeira et al.      | Sample planning for quantifying and mapping magnetic susceptibility, clay content, and base saturation using auxiliary information        | Geordema                                                                    | English    |
| 2017 | Faiçal et al.        | An adaptive approach for UAV-based pesticide spraying in dynamic environments                                                             | Computers and Electronics in Agriculture                                    | English    |
| 2018 | Pelegrino et al.     | Synthesis of proximal sensing, terrain analysis, and parent material information for available micronutrient prediction in tropical soils | Precision Agriculture                                                       | English    |
| 2018 | Baio et al.          | Variable rate spraying application on cotton using an electronic flow controller                                                          | Precision Agriculture                                                       | English    |

|      |                     |                                                                                                                                                                             |                                                                     |            |
|------|---------------------|-----------------------------------------------------------------------------------------------------------------------------------------------------------------------------|---------------------------------------------------------------------|------------|
| 2018 | Marin et al.        | Multispectral radiometric monitoring of bacterial blight of coffee                                                                                                          | Precision Agriculture                                               | English    |
| 2018 | Santos et al.       | Use of real-time extend GNSS for planting and inverting peanuts                                                                                                             | Precision Agriculture                                               | English    |
| 2018 | Pivoto et al.       | Scientific development of smart farming technologies and their application in Brazil                                                                                        | Information Processing in Agriculture                               | English    |
| 2018 | Sanches et al.      | Potential of apparent soil electrical conductivity to describe the soil pH and improve lime application in a clayey soil                                                    | Soil and Tillage Research                                           | English    |
| 2018 | Betzek et al.       | Rectification methods for optimization of management zones                                                                                                                  | Computers and Electronics in Agriculture                            | English    |
| 2018 | Coelho et al.       | An open-source spatial analysis system for embedded systems                                                                                                                 | Computers and Electronics in Agriculture                            | English    |
| 2018 | Sayao et al.        | Soil texture and organic carbon mapping using surface temperature and reflectance spectra in Southeast Brazil                                                               | Geoderma Regional                                                   | English    |
| 2018 | Dematte et al.      | Geospatial Soil Sensing System (GEOS3): A powerful data mining procedure to retrieve soil spectral reflectance from satellite images                                        | Remote Sensing of Environment                                       | English    |
| 2018 | Santana et al.      | Visible and near infrared spectroscopy coupled to random forest to quantify some soil quality parameters                                                                    | Spectrochimica Acta Part A: Molecular and Biomolecular Spectroscopy | English    |
| 2018 | Franceschini et al. | Effects of external factors on soil reflectance measured on-the-go and assessment of potential spectral correction through orthogonalisation and standardisation procedures | Soil and Tillage Research                                           | English    |
| 2018 | Baena et al.        | UAVs in pursuit of plant conservation - Real world experiences                                                                                                              | Ecological Informatics                                              | English    |
| 2018 | Umbelino et al.     | Definições de zona de manejo para soja de alta produtividade                                                                                                                | Revista de Ciências Agrárias                                        | Portuguese |
| 2018 | Sayao et al.        | Satellite land surface temperature and reflectance related with soil attributes                                                                                             | Geoderma                                                            | English    |
| 2018 | Silva et al.        | Large-Scale Spatial Modeling of Crop Coefficient and Biomass Production in Agroecosystems in Southeast Brazil                                                               | HORTICULTURAE                                                       | English    |
| 2018 | Bernardi et al.     | Mapping of yield, economic return, soil electrical conductivity, and management zones of irrigated corn for silage                                                          | PESQUISA AGROPECUARIA BRASILEIRA                                    | English    |
| 2018 | Corassa et al.      | Optimum Soybean Seeding Rates by Yield Environment in Southern Brazil                                                                                                       | AGRONOMY JOURNAL                                                    | English    |
| 2018 | Fongaro et al.      | Improvement of Clay and Sand Quantification Based on a Novel Approach with a Focus on Multispectral Satellite Images                                                        | REMOTE SENSING                                                      | English    |
| 2018 | Cortez et al.       | SPATIALIZATION OF SOIL RESISTANCE TO PENETRATION FOR LOCALIZED MANAGEMENT BY PRECISION AGRICULTURE TOOLS                                                                    | ENGENHARIA AGRICOLA                                                 | English    |

|      |                      |                                                                                                                          |                                                |            |
|------|----------------------|--------------------------------------------------------------------------------------------------------------------------|------------------------------------------------|------------|
| 2018 | Schwalbert et al.    | Forecasting maize yield at field scale based on high-resolution satellite imagery                                        | BIOSYSTEMS ENGINEERING                         | English    |
| 2018 | dos Santos et al.    | POSITION ERRORS IN SOWING IN CURVED AND RECTILINEAR ROUTES USING AUTOPILOT                                               | ENGENHARIA AGRICOLA                            | English    |
| 2018 | Da Silva et al.      | SPATIAL CONTINUITY OF ELECTRICAL CONDUCTIVITY, SOIL WATER CONTENT AND TEXTURE ON A CULTIVATED AREA WITH CANE SUGAR       | REVISTA CAATINGA                               | English    |
| 2018 | Moreno-Pizani et al. | Crop Water Stress Index for a medicinal plant ( <i>Baccharis crispa</i> Spreng.) under variable irrigation levels        | WATER RESOURCES AND IRRIGATION MANAGEMENT-WRIM | English    |
| 2018 | Antonini et al.      | ADOÇÃO E USO DA AGRICULTURA DE PRECISÃO NA REGIÃO DAS MISSÕES DO RIO GRANDE DO SUL                                       | HOLOS                                          | Portuguese |
| 2018 | Dalchiavon et al.    | Inter-relação entre parâmetros do algodoeiro com atributos químicos do solo no Brasil Central                            | Revista de Ciências Agrárias                   | Portuguese |
| 2018 | Patricio et al.      | Computer vision and artificial intelligence in precision agriculture for grain crops: A systematic review                | Computers and Electronics in Agriculture       | English    |
| 2018 | Martins et al.       | Crambe grain yield and oil content affected by spatial variability in soil physical properties                           | Renewable and Sustainable Energy Reviews       | English    |
| 2018 | Sobenko              | An iris mechanism for variable rate sprinkler irrigation                                                                 | Biosystems Engineering                         | English    |
| 2019 | Schossler et al.     | Geospatial variation of physical attributes and sugarcane productivity in cohesive soils                                 | Precision Agriculture                          | English    |
| 2019 | Oliveira et al.      | Spatial variability of the physical quality of soil from management zones                                                | Precision Agriculture                          | English    |
| 2019 | Sanches et al.       | Site-specific assessment of spatial and temporal variability of sugarcane yield related to soil attributes               | Geoderma                                       | English    |
| 2019 | Jesus et al.         | Sustainability assessment of sugarcane production systems: SustenAgro Decision Support System                            | Environmental Development                      | English    |
| 2019 | Amorim et al.        | Semi-supervised learning with convolutional neural networks for UAV images automatic recognition                         | Computers and Electronics in Agriculture       | English    |
| 2019 | Santos et al.        | AgriPrediction: A proactive internet of things model to anticipate problems and improve production in agricultural crops | Computers and Electronics in Agriculture       | English    |
| 2019 | Gavioli et al.       | Identification of management zones in precision agriculture: An evaluation of alternative cluster analysis methods       | Biosystems Engineering                         | English    |

|      |                    |                                                                                                                                                         |                                                                       |         |
|------|--------------------|---------------------------------------------------------------------------------------------------------------------------------------------------------|-----------------------------------------------------------------------|---------|
| 2019 | Coutinho et al.    | Influence of soil sample preparation on the quantification of NPK content via spectroscopy                                                              | Geoderma                                                              | English |
| 2019 | Dematte et al.     | Soil analytical quality control by traditional and spectroscopy techniques: Constructing the future of a hybrid laboratory for low environmental impact | Geoderma                                                              | English |
| 2019 | Betzek et al.      | Computational routines for the automatic selection of the best parameters used by interpolation methods to create thematic maps                         | Computers and Electronics in Agriculture                              | English |
| 2019 | Osco et al.        | Improvement of leaf nitrogen content inference in Valencia-orange trees applying spectral analysis algorithms in UAV mounted-sensor images              | International Journal of Applied Earth Observation and Geoinformation | English |
| 2019 | Santana et al.     | Green methodology for soil organic matter analysis using a national near infrared spectral library in tandem with learning machine                      | Science of The Total Environment                                      | English |
| 2019 | Oldoni et al.      | Delineation of management zones in a peach orchard using multivariate and geostatistical analyses                                                       | Soil and Tillage Research                                             | English |
| 2019 | Junior et al.      | The adoption stages (Evaluation, Adoption, and Routinisation) of ERP systems with business analytics functionality in the context of farms              | Computers and Electronics in Agriculture                              | English |
| 2019 | Moura-Bueno et al. | Stratification of a local VIS-NIR-SWIR spectral library by homogeneity criteria yields more accurate soil organic carbon predictions                    | Geoderma                                                              | English |
| 2019 | Mendes et al.      | Fuzzy control system for variable rate irrigation using remote sensing                                                                                  | Expert Systems with Applications                                      | English |
| 2019 | Morais et al.      | Predicting soil texture using image analysis                                                                                                            | Microchemical Journal                                                 | English |
| 2019 | Langreo et al.     | Using spatial information for evaluating the quality of prediction maps from hyperspectral images: A geostatistical approach                            | Analytica Chimica Acta                                                | English |
| 2019 | Voss et al.        | Peach growth cycle monitoring using an electronic nose                                                                                                  | Computers and Electronics in Agriculture                              | English |
| 2019 | Ferraciolli et al. | Neglecting spatial autocorrelation causes underestimation of the error of sugarcane yield models                                                        | Computers and Electronics in Agriculture                              | English |
| 2019 | Rivera et al.      | Sound as a qualitative index of speckle laser to monitor biological systems                                                                             | Computers and Electronics in Agriculture                              | English |
| 2019 | Calou et al.       | ESTIMATION OF MAIZE BIOMASS USING UNMANNED AERIAL VEHICLES                                                                                              | ENGENHARIA AGRICOLA                                                   | English |
| 2019 | Pott et al.        | Mitigation of soil compaction for boosting crop productivity at varying yield environments in southern Brazil                                           | EUROPEAN JOURNAL OF SOIL SCIENCE                                      | English |



|      |                  |                                                                                                                                                           |                                                       |            |
|------|------------------|-----------------------------------------------------------------------------------------------------------------------------------------------------------|-------------------------------------------------------|------------|
| 2019 | Matias et al.    | Recomendação de calagem com base na variabilidade espacial de atributos químicos do solo no Cerrado brasileiro                                            | Revista de Ciências Agrárias                          | Portuguese |
| 2019 | Martins et al.   | Accuracy Assessments of Stochastic and Deterministic Interpolation Methods in Estimating Soil Attributes Spatial Variability                              | COMMUNICATIONS IN SOIL SCIENCE AND PLANT ANALYSIS     | English    |
| 2019 | Carneiro et al.  | CORRELATIONS AMONG VEGETATION INDICES AND PEANUT TRAITS DURING DIFFERENT CROP DEVELOPMENT STAGES                                                          | ENGENHARIA AGRICOLA                                   | English    |
| 2019 | Colaco et al.    | Spatial variability in commercial orange groves. Part 1: canopy volume and height                                                                         | PRECISION AGRICULTURE                                 | English    |
| 2019 | Corassa et al.   | Performance of soybean varieties differs according to yield class: a case study from Southern Brazil                                                      | PRECISION AGRICULTURE                                 | English    |
| 2019 | Shwalbert et al. | Fine-tuning of wheat ( <i>Triticum aestivum</i> , L.) variable nitrogen rate by combining crop sensing and management zones approaches in southern Brazil | PRECISION AGRICULTURE                                 | English    |
| 2019 | Sanches et al.   | Site-specific assessment of spatial and temporal variability of sugarcane yield related to soil attributes                                                | GEODERMA                                              | English    |
| 2019 | Soares et al.    | Diagnosis of losses in the mechanized harvest of two cultivars of industrial tomato                                                                       | REVISTA BRASILEIRA DE CIENCIAS AGRARIAS-AGRARIA       | English    |
| 2019 | Pivoto et al.    | Factors influencing the adoption of smart farming by Brazilian grain farmers                                                                              | INTERNATIONAL FOOD AND AGRIBUSINESS MANAGEMENT REVIEW | English    |
| 2019 | Bueno et al.     | DEMARCATON OF LEVEES IN IRRIGATED RICE FIELDS: LASER TECHNOLOGY VS. GNSS-RTK                                                                              | APPLIED ENGINEERING IN AGRICULTURE                    | English    |
| 2019 | Marin et al.     | Sensoriamento remoto multiespectral na identificação e mapeamento das variáveis bióticas e abióticas do cafeeiro                                          | Revista Ceres                                         | Portuguese |
| 2019 | Damian et al.    | Applying the NDVI from satellite images in delimiting management zones for annual crops                                                                   | Scientia Agricola                                     | English    |
| 2019 | Sanches et al.   | Precision production environments for sugarcane fields                                                                                                    | SCIENTIA AGRICOLA                                     | English    |
| 2019 | Ferraz et al.    | Spatial variability of soil pH sampled by two methodologies used in precision agriculture in farms under crop rotation                                    | DYNA                                                  | English    |
| 2019 | Barbedo et al.   | Detection of nutrition deficiencies in plants using proximal images and machine learning: A review                                                        | Computers and Electronics in Agriculture              | English    |
| 2020 | Santos et al.    | Biophysical parameters of coffee crop estimated by UAV RGB images                                                                                         | Precision Agriculture                                 | English    |

|      |                  |                                                                                                                              |                                                                       |         |
|------|------------------|------------------------------------------------------------------------------------------------------------------------------|-----------------------------------------------------------------------|---------|
| 2020 | Cortez et al.    | Subsoiling of an oxisol at fixed and varying depth in areas under sugarcane                                                  | Precision Agriculture                                                 | English |
| 2020 | Carneiro et al.  | Comparison between vegetation indices for detecting spatial and temporal variabilities in soybean crop using canopy sensors  | Precision Agriculture                                                 | English |
| 2020 | Souza et al.     | Detecting abnormal sensors via machine learning: An IoT farming WSN-based architecture case study                            | Measurement                                                           | English |
| 2020 | Helfer et al.    | A computational model for soil fertility prediction in ubiquitous agriculture                                                | Computers and Electronics in Agriculture                              | English |
| 2020 | DallAgnol        | Web applications for spatial analyses and thematic map generation                                                            | Computers and Electronics in Agriculture                              | English |
| 2020 | Breunig et al.   | Assessing the effect of spatial resolution on the delineation of management zones for smallholder farming in southern Brazil | Remote Sensing Applications: Society and Environment                  | English |
| 2020 | Souza et al.     | Spectral differentiation of sugarcane from weeds                                                                             | Biosystems Engineering                                                | English |
| 2020 | Venancio et al.  | Forecasting corn yield at the farm level in Brazil based on the FAO-66 approach and soil-adjusted vegetation index (SAVI)    | Agricultural Water Management                                         | English |
| 2020 | Breunig et al.   | Delineation of management zones in agricultural fields using cover-crop biomass estimates from PlanetScope data              | International Journal of Applied Earth Observation and Geoinformation | English |
| 2020 | Silva et al.     | UAV-multispectral and vegetation indices in soybean grain yield prediction based on in situ observation                      | Remote Sensing Applications: Society and Environment                  | English |
| 2020 | Freitas et al.   | Use of UAVs for an efficient capsule distribution and smart path planning for biological pest control                        | Computers and Electronics in Agriculture                              | English |
| 2020 | Sanches et al.   | Comprehensive assessment of spatial soil variability related to topographic parameters in sugarcane fields                   | Geoderma                                                              | English |
| 2020 | Valente et al.   | Accuracy and precision evaluation of two low-cost RTK global navigation satellite systems                                    | Computers and Electronics in Agriculture                              | English |
| 2020 | Coblinski et al. | Prediction of soil texture classes through different wavelength regions of reflectance spectroscopy at various soil depths   | Catena                                                                | English |
| 2020 | Santos et al.    | EDXRF spectral data combined with PLSR to determine some soil fertility indicators                                           | Microchemical Journal                                                 | English |
| 2020 | Santos et al.    | Grape detection, segmentation, and tracking using deep neural networks and three-dimensional association                     | Computers and Electronics in Agriculture                              | English |
| 2020 | Calou et al.     | The use of UAVs in monitoring yellow sigatoka in banana                                                                      | Biosystems Engineering                                                | English |

|      |                 |                                                                                                                                        |                                                                       |         |
|------|-----------------|----------------------------------------------------------------------------------------------------------------------------------------|-----------------------------------------------------------------------|---------|
| 2020 | Fonseca et al.  | Agro 4.0: A data science-based information system for sustainable agroecosystem management                                             | Simulation Modelling Practice and Theory                              | English |
| 2020 | Souza et al.    | The use of vegetation index via remote sensing allows estimation of soybean application rate                                           | Remote Sensing Applications: Society and Environment                  | English |
| 2020 | Oliveira et al. | Using electromagnetic induction technology to identify atrazine leaching potential at field scale                                      | Geoderma                                                              | English |
| 2020 | Osco et al.     | A convolutional neural network approach for counting and geolocating citrus-trees in UAV multispectral imagery                         | ISPRS Journal of Photogrammetry and Remote Sensing                    | English |
| 2020 | Alves et al.    | Cotton pests classification in field-based images using deep residual networks                                                         | Computers and Electronics in Agriculture                              | English |
| 2020 | Miranda et al.  | Detection of coffee berry necrosis by digital image processing of landsat 8 oli satellite imagery                                      | International Journal of Applied Earth Observation and Geoinformation | English |
| 2020 | Bazame et al.   | Spectral sensors prove beneficial in determining nitrogen fertilizer needs of Urochloa brizantha cv. Xaraes grass in Brazil            | TROPICAL GRASSLANDS-FORRAJES TROPICALES                               | English |
| 2020 | Tavares et al.  | Effect of X-Ray Tube Configuration on Measurement of Key Soil Fertility Attributes with XRF                                            | REMOTE SENSING                                                        | English |
| 2020 | Oliveira et al. | Spatial Variability of Irrigated Garlic (Allium sativum L.) Production Components                                                      | HORTSCIENCE                                                           | English |
| 2020 | Martins et al.  | Site-specific Nutrient Management Zones in Soybean Field Using Multivariate Analysis: An Approach Based on Variable Rate Fertilization | COMMUNICATIONS IN SOIL SCIENCE AND PLANT ANALYSIS                     | English |
| 2020 | Veettil et al.  | Mitigation of ionospheric scintillation effects on GNSS precise point positioning (PPP) at low latitudes                               | JOURNAL OF GEODESY                                                    | English |
| 2020 | Tavares et al.  | Assessing Soil Key Fertility Attributes Using a Portable X-ray Fluorescence: A Simple Method to Overcome Matrix Effect                 | AGRONOMY JOURNAL                                                      | English |
| 2020 | Queiroz et al.  | DEVELOPMENT AND TESTING OF A LOW-COST PORTABLE APPARENT SOIL ELECTRICAL CONDUCTIVITY SENSOR USING A BEAGLEBONE BLACK                   | APPLIED ENGINEERING IN AGRICULTURE                                    | English |
| 2020 | Borges et al.   | Web software to create thematic maps for precision agriculture                                                                         | PESQUISA AGROPECUARIA BRASILEIRA                                      | English |

|      |                   |                                                                                                    |                                  |         |
|------|-------------------|----------------------------------------------------------------------------------------------------|----------------------------------|---------|
| 2020 | Da Silva et al.   | EFFECTS OF SPATIAL VARIABILITY OF SOIL CHEMICAL PARAMETERS ON TIFTON 85 GRASS YIELD                | REVISTA CAATINGA                 | English |
| 2020 | Kazama et al.     | Variability of harvest loss in relation to physiological characteristics of cotton                 | Acta Scientiarum. Agronomy       | English |
| 2020 | Tavares et al.    | Effects of storage on vis-NIR-SWIR reflectance spectra of Mombasa grass leaf samples               | Ciência Rural                    | English |
| 2020 | Foguesatto et al. | A review and some reflections on farmers' adoption of sustainable agricultural practices worldwide | Science of The Total Environment | English |

**Table S2. List of main textbooks related to precision agriculture published in Brazil**

| Reference                | Title                                                                                                                                                                         | ISBN/ISSN         | Source                                                                                                                                                                                                                                                                                                                                            |
|--------------------------|-------------------------------------------------------------------------------------------------------------------------------------------------------------------------------|-------------------|---------------------------------------------------------------------------------------------------------------------------------------------------------------------------------------------------------------------------------------------------------------------------------------------------------------------------------------------------|
| Silva and Borges (1998)  | <i>Mecanização e Agricultura de Precisão</i><br>Mechanization and Precision Agriculture*                                                                                      | ---               | Hardcopy                                                                                                                                                                                                                                                                                                                                          |
| Balastreire (1998)       | <i>Agricultura de Precisão</i><br>Precision Agriculture                                                                                                                       | ---               | Hardcopy                                                                                                                                                                                                                                                                                                                                          |
| Balastreire (2000)       | <i>O estado da arte da Agricultura de Precisão no Brasil</i><br>The state-of-the-art of Precision Agriculture in Brazil                                                       | ---               | Hardcopy                                                                                                                                                                                                                                                                                                                                          |
| Borém et al. (2000)      | <i>Agricultura de Precisão</i><br>Precision Agriculture                                                                                                                       | ---               | Hardcopy                                                                                                                                                                                                                                                                                                                                          |
| Lamparelli et al. (2001) | <i>Geoprocessamento e Agricultura de Precisão: fundamentos e aplicações</i><br>Geoprocessing and Precision Agriculture: principles and applications                           | 8585347775        | Hardcopy                                                                                                                                                                                                                                                                                                                                          |
| Molin (2010)             | <i>Agricultura de Precisão: o gerenciamento da variabilidade</i><br>Precision Agriculture: the variability management                                                         | 858935315-X       | Hardcopy                                                                                                                                                                                                                                                                                                                                          |
| Machado et al. (2004)    | <i>Agricultura de Precisão para o manejo da fertilidade do solo em sistema de plantio direto</i><br>Precision agriculture to the soil fertility management in no-till systems | 8-85864-13-3      | Hardcopy & digital<br><a href="https://www.embrapa.br/busca-de-publicacoes/-/publicacao/337351/agricultura-de-precisao-para-o-manejo-da-fertilidade-do-solo-em-sistema-plantio-direto">https://www.embrapa.br/busca-de-publicacoes/-/publicacao/337351/agricultura-de-precisao-para-o-manejo-da-fertilidade-do-solo-em-sistema-plantio-direto</a> |
| Inamasu et al. (2011)    | <i>Agricultura de Precisão: um novo olhar</i><br>Precision Agriculture: a new perspective                                                                                     | 978-85-86463-31-0 | Hardcopy & digital<br><a href="https://www.embrapa.br/busca-de-publicacoes/-/publicacao/916714/agricultura-de-precisao-um-novo-olhar">https://www.embrapa.br/busca-de-publicacoes/-/publicacao/916714/agricultura-de-precisao-um-novo-olhar</a>                                                                                                   |
|                          | <i>Caféicultura de Precisão</i>                                                                                                                                               | 978-85-8127-019-7 | Hardcopy                                                                                                                                                                                                                                                                                                                                          |

|                           |                                                                                                                      |                   |                                                                                                                                                                                                                                                                                             |
|---------------------------|----------------------------------------------------------------------------------------------------------------------|-------------------|---------------------------------------------------------------------------------------------------------------------------------------------------------------------------------------------------------------------------------------------------------------------------------------------|
| Silva and Alves<br>(2013) | Precision coffee farming                                                                                             |                   |                                                                                                                                                                                                                                                                                             |
| Bernardi et al.<br>(2014) | <i>Agricultura de Precisão: resultados de um novo olhar</i><br>Precision Agriculture: results from a new perspective | 978-85-7035-352-8 | Hardcopy & digital<br><a href="https://www.embrapa.br/busca-de-publicacoes/-/publicacao/1002959/agricultura-de-precisao-resultados-de-um-novo-olhar">https://www.embrapa.br/busca-de-publicacoes/-/publicacao/1002959/agricultura-de-precisao-resultados-de-um-novo-olhar</a>               |
| Molin et al.<br>(2015)    | <i>Agricultura de Precisão</i><br>Precision Agriculture                                                              | 978-85-7975-213-1 | Hardcopy & digital<br><a href="https://www.bibliotecaagptea.org.br/agricultura/precisao/livros/AGRICULTURA%20DE%20PRECISAO%20-%20OFICINA%20DE%20TEXTOS.pdf">https://www.bibliotecaagptea.org.br/agricultura/precisao/livros/AGRICULTURA%20DE%20PRECISAO%20-%20OFICINA%20DE%20TEXTOS.pdf</a> |
| Santi et al.<br>(2016)    | <i>Agricultura de Precisão no Rio Grande do Sul</i><br>Precision Agriculture in Rio Grande do Sul state              | 978-85-92745-02-8 | Hardcopy & digital<br><a href="https://www.ufsm.br/app/uploads/sites/526/2019/01/AP_RS.pdf">https://www.ufsm.br/app/uploads/sites/526/2019/01/AP_RS.pdf</a>                                                                                                                                 |
| Queiroz et al.<br>(2020)  | Agricultura Digital<br>Digital agriculture                                                                           | 978-65-99035-93-7 | Hardcopy                                                                                                                                                                                                                                                                                    |

---

\*Free translation of book titles from Portuguese to English
